# Supplementary material
Source: PubMed Central journal article supplement (PMC2748931)

## SUPPLEMENTAL FIGURE LEGENDS

**Fig. S1. Fins recover lost structures after restoration of Fgf signaling.** The same *hsp70:dn-fgfr1* fin pictured at day 60 of Fgfr inhibition (left), and after 30 days of recovery at room temperature (right). The majority of fin rays recover ostensibly all lost structures. Inset shows region from which new growth was initiated after Fgf signaling. Arrowheads indicate the start of new tissue.

**Fig. S2. Injuries to distal fin structures are rare under laboratory conditions.**

In animals imaged every 2-3 days over 14 to 24 days, we found that injuries and loss of distal bone are rare (2 events in 13 animals), and rapidly regenerated (arrows). Scale bar = 100  $\mu\text{m}$ .

**Fig. S3. Markers of facultative regeneration are expressed at low levels in uninjured fins.**

The blastemal regulators *mkp3*, *msxb*, *fgf20a*, and *mps1* are all robustly expressed in samples from regenerating fins, as assessed by RT-PCR. Expression of these factors is reduced, but detectable, in the uninjured fin. The control,  *$\beta$ -actin1*, is found at similar levels in samples taken from both uninjured and regenerating fins.

***hsp70:dn-fgfr1*, 60d hs**

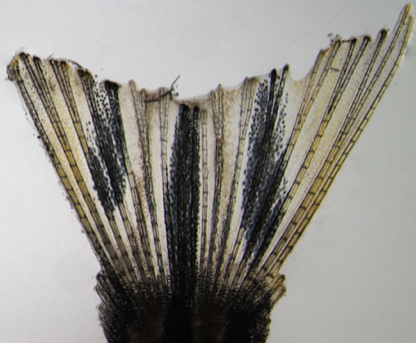

***hsp70:dn-fgfr1*, 60d hs / 30 dr**

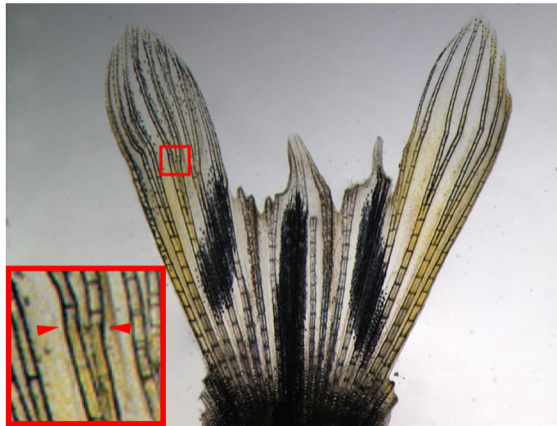

**day 1**

**day 3**

**day 5**

**No injury**

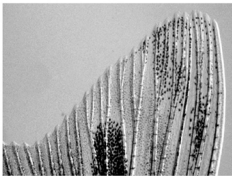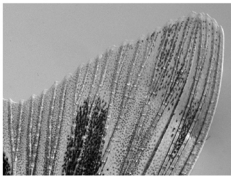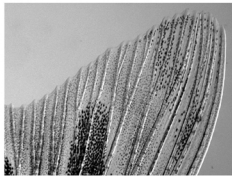

**Minor Injury (rare)**

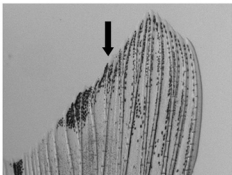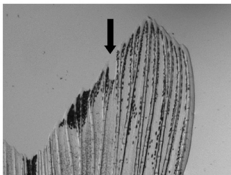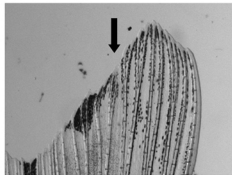

Uninjured (-RT)

Regenerate (-RT)

Uninjured

Regenerate

*$\beta$ actin1*

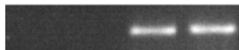

*mkp3*

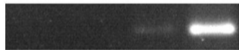

*msxb*

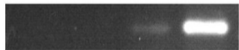

*fgf20a*

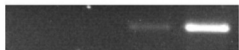

*mps1*

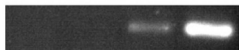

Supplement: NIHMS68772-supplement-Wills_Supplementary_Data.pdf [file NIHMS68772-supplement-Wills_Supplementary_Data.pdf]
